# Supplementary material for: Risk Factors for Antimicrobial Use on Irish Pig Farms
Source: MDPI journal article supplement (doi:10.3390/ani11102828), 2021-09-28
Supplement: s1 [file s1]

**Table S1.** Summary of farm characteristics and performance for 52 Irish farrow-to-finish pig farms in 2016.

|                                  | <b>mean (SD)</b> | <b>median (range)</b> |
|----------------------------------|------------------|-----------------------|
| Herd size (no. of sows)          | 745.5 (511.8)    | 650 (113 - 2354)      |
| Piglet mortality (%)             | 9.9 (2.8)        | 9.7 (1.3 - 16.3)      |
| Weaner mortality (%)             | 2.6 (1.5)        | 2.4 (0.7 - 9.4)       |
| Finisher mortality (%)           | 2.2 (1.0)        | 2 (0.8 - 5.1)         |
| Average daily gain (g)           | 704.4 (60.2)     | 699.5 (554 - 856)     |
| Feed conversion ratio            | 2.4 (0.1)        | 2.4 (2.1 - 2.8)       |
| Pigs produced per sow per year   | 26.1 (2)         | 26 (22.4 - 31)        |
| Age at weaning (days)            | 29.3 (3.8)       | 29 (19 - 37)          |
| Weaner stage (days)              | 66 (10.1)        | 66.6 (38.3 - 94.1)    |
| Finisher stage (days)            | 76.7 (10.6)      | 75.8 (60.7 - 102.2)   |
| Total rearing period (days)      | 172 (12.6)       | 169.5 (146 - 210)     |
| No. of sows per employee         | 157.9 (39.5)     | 160.5 (56.5 - 237.4)  |
| Farmer experience (years)        | 27 (10.2)        | 30 (5 - 50)           |
| Age of youngest building (years) | 3.7 (5.0)        | 2.5 (0 - 25)          |
| Age of oldest building (years)   | 36.1 (26.5)      | 33.5 (12 - 210)       |

**Table S2.** Summary of biosecurity scores evaluated using the Biocheck.UGent™ questionnaire from 52 Irish farrow-to-finish pig farms in 2016.

| <b>Category</b>                                          | <b>mean (SD)</b> | <b>median (range)</b> |
|----------------------------------------------------------|------------------|-----------------------|
| <i>External biosecurity</i>                              |                  |                       |
| Purchase of animals and semen                            | 98.8 (5.2)       | 100 (70 - 100)        |
| Transport of animals, removal of manure and dead animals | 80.4 (11.2)      | 83 (43 - 96)          |
| Feed, water and equipment supply                         | 54.6 (15.1)      | 53 (10 - 80)          |
| Personnel and visitors                                   | 74.1 (18.8)      | 76 (24 - 100)         |
| Vermin and bird control                                  | 68.7 (20)        | 70 (30 - 100)         |
| Environment and region                                   | 83.1 (21.6)      | 90 (20 - 100)         |
| Overall external biosecurity score                       | 79.2 (7.9)       | 79.5 (62 - 94)        |
| <i>Internal biosecurity</i>                              |                  |                       |
| Disease management                                       | 82.3 (22.6)      | 100 (20 - 100)        |
| Farrowing and suckling period                            | 53 (19.5)        | 53.5 (7 - 86)         |
| Nursery unit management                                  | 63.2 (16.3)      | 67.5 (36 - 100)       |
| Finisher unit management                                 | 73.2 (22)        | 79 (21 - 93)          |
| Measures between compartments and the use of equipment   | 50.1 (16.1)      | 50 (21 - 86)          |
| Cleaning and disinfection                                | 41.2 (27.9)      | 38 (0 - 95)           |
| Overall internal biosecurity score                       | 57.2 (14.4)      | 60 (29 - 80)          |
| Overall biosecurity score                                | 68.4 (9.7)       | 70 (47 - 87)          |

**Table S3.** Summary of vaccination and prophylactic antimicrobial use practices on 52 Irish farrow-to finish pig farms during 2016.

|                                                                                   | Response   |            |
|-----------------------------------------------------------------------------------|------------|------------|
|                                                                                   | Yes        | No         |
|                                                                                   | n (%)      | n (%)      |
| <b><i>Vaccination practices (yes vs no)</i></b>                                   |            |            |
| Swine influenza virus                                                             | 19 (36.5%) | 33 (63.5%) |
| PRRSv                                                                             | 21 (40.4%) | 31 (59.6%) |
| Porcine parvovirus                                                                | 52 (100%)  | 0 (0%)     |
| <i>Erysipelothrix rhusiopathiae</i>                                               | 52 (100%)  | 0 (0%)     |
| PCV2                                                                              | 49 (94.2%) | 3 (5.8%)   |
| <i>Mycoplasma hyopneumoniae</i>                                                   | 39 (75.0%) | 13 (25%)   |
| <i>Escherichia coli</i>                                                           | 44 (84.6%) | 8 (15.4%)  |
| <i>Glaesserella parasuis</i>                                                      | 0 (0%)     | 52 (100%)  |
| <i>Actinobacillus pleuropneumoniae</i>                                            | 5 (9.6%)   | 47 (90.4%) |
| <i>Clostridium</i> species                                                        | 9 (17.3%)  | 43 (82.7%) |
| Atrophic rhinitis                                                                 | 4 (7.7%)   | 48 (92.3%) |
| <b><i>Prophylactic use of antimicrobials in stage (yes vs no)<sup>a</sup></i></b> |            |            |
| Sow                                                                               | 20 (38.5%) | 32 (61.5%) |
| Piglet                                                                            | 26 (50%)   | 26 (50%)   |
| Weaner                                                                            | 7 (13.5%)  | 45 (86.5%) |
| Finisher                                                                          | 2 (3.8%)   | 50 (86.2%) |

<sup>a</sup> Does not include administration of medicated feed to piglets, weaners, or finishers

Legend: PRRSv - porcine reproductive and respiratory syndrome virus; PCV2 - porcine circovirus 2

**Table S4.** Summary of prevalence of pluck lesions and disease status on 52 Irish farrow-to-finish pig farms. Disease status was determined based on serology. Evaluation of pluck lesions and collection of blood for serology were carried out at slaughter.

| <b>Lesion</b>                          | <b>mean (SD)</b> | <b>median (range)</b> |
|----------------------------------------|------------------|-----------------------|
| Pleurisy                               | 13.8 (15.2)      | 7.2 (0.4 - 51.8)      |
| Moderate to severe pleurisy            | 11.5 (12.8)      | 6.2 (0 - 46.9)        |
| Cranial pleurisy                       | 15.5 (13.4)      | 10.8 (1.2 - 54.2)     |
| Pneumonia                              | 10.6 (10.9)      | 7.7 (0 - 50)          |
| Scars                                  | 13.2 (9.7)       | 11.1 (0 - 39.3)       |
| Lung abscesses                         | 1.3 (3.5)        | 0.2 (0 - 21.5)        |
| Pericarditis                           | 8.1 (4.4)        | 7.6 (1.2 - 19.1)      |
| Liver milk spots                       | 28.6 (27.3)      | 17.9 (0.4 - 97.3)     |
| <b>Disease status</b>                  | <b>positive</b>  | <b>negative</b>       |
| <i>Actinobacillus pleuropneumoniae</i> | 51 (98.1%)       | 1 (1.9%)              |
| PRRSv                                  | 24 (46.2%)       | 28 (53.8%)            |
| Swine influenza virus (IAv)            | 40 (76.9%)       | 12 (23.1%)            |
| <i>Mycoplasma hyopneumoniae</i>        | 36 (69.2%)       | 16 (30.8%)            |

Legend: IAv - influenza A virus; PRRSv - porcine reproductive and respiratory syndrome virus; Mhyo - *Mycoplasma hyopneumoniae*

**Table S5.** Summary of P-values for the univariable linear regression models investigating risk factors for antimicrobial use (AMU) on 52 Irish farrow-to-finish pig farms during 2016. The outcome variables were total AMU [TI<sub>total</sub>], group oral AMU (TI<sub>group</sub>), individual AMU (TI<sub>individual</sub>) and cephalosporin/fluoroquinolone use (TI<sub>ceflq</sub>) expressed as Treatment Incidence (TI200). The outcome variables were log transformed prior to analysis.

| Predictor variables                                      | Outcome variables   |                     |                          |                     |
|----------------------------------------------------------|---------------------|---------------------|--------------------------|---------------------|
|                                                          | TI <sub>total</sub> | TI <sub>group</sub> | TI <sub>individual</sub> | TI <sub>ceflq</sub> |
| <i>Herd characteristics</i>                              |                     |                     |                          |                     |
| Herd size (no. of sows)                                  | 0.425               | 0.367               | 0.694                    | 0.911               |
| Piglet mortality (%)                                     | 0.947               | 0.865               | 0.389                    | 0.562               |
| Weaner mortality (%)                                     | 0.828               | 0.835               | 0.404                    | 0.225               |
| Finisher mortality (%)                                   | 0.003               | 0.002               | 0.78                     | 0.7                 |
| Average daily gain (g)                                   | 0.622               | 0.741               | 0.725                    | 0.683               |
| Feed conversion ratio                                    | 0.613               | 0.542               | 0.657                    | 0.46                |
| Pigs produced per sow per year                           | 0.894               | 0.942               | 0.615                    | 0.361               |
| Age at weaning (days)                                    | 0.204               | 0.12                | 0.354                    | 0.228               |
| Weaner stage (days)                                      | 0.153               | 0.204               | 0.472                    | 0.304               |
| Finisher stage (days)                                    | 0.197               | 0.151               | 0.747                    | 0.632               |
| Total rearing period (days)                              | 0.75                | 0.519               | 0.26                     | 0.954               |
| No. of sows per employee                                 | 0.952               | 0.887               | 0.828                    | 0.451               |
| Farmer experience (years)                                | 0.789               | 0.857               | 0.705                    | 0.84                |
| Age of youngest building (years)                         | 0.943               | 0.918               | 0.355                    | 0.896               |
| Age of oldest building (years)                           | 0.736               | 0.737               | 0.805                    | 0.504               |
| Home milling ( <i>ref</i> = <i>no</i> )                  | 0.001               | 0.001               | 0.747                    | 0.784               |
| <i>Biosecurity scores</i>                                |                     |                     |                          |                     |
| Purchase of animals and semen                            | 0.975               | 0.906               | 0.434                    | 0.618               |
| Transport of animals, removal of manure and dead animals | 0.867               | 0.998               | 0.55                     | 0.302               |
| Feed, water and equipment supply                         | 0.057               | 0.133               | 0.147                    | 0.065               |
| Personnel and visitors                                   | 0.462               | 0.691               | 0.332                    | 0.814               |
| Vermin and bird control                                  | 0.802               | 0.857               | 0.212                    | 0.624               |
| Environment and region                                   | 0.892               | 0.679               | 0.79                     | 0.656               |
| Overall external biosecurity score                       | 0.335               | 0.58                | 0.362                    | 0.512               |
| Disease management                                       | 0.255               | 0.159               | 0.975                    | 0.831               |
| Farrowing and suckling period                            | 0.26                | 0.365               | 0.632                    | 0.694               |
| Nursery unit management                                  | 0.61                | 0.652               | 0.86                     | 0.459               |
| Finisher unit management                                 | 0.919               | 0.979               | 0.676                    | 0.594               |
| Measures between compartments and the use of equipment   | 0.461               | 0.64                | 0.989                    | 0.995               |
| Cleaning and disinfection                                | 0.478               | 0.617               | 0.463                    | 0.161               |
| Overall internal biosecurity score                       | 0.313               | 0.42                | 0.62                     | 0.406               |
| Overall biosecurity score                                | 0.254               | 0.411               | 0.468                    | 0.392               |

Legend: IAv - influenza A virus; PRRSv - porcine reproductive and respiratory syndrome virus; Mhyo - *Mycoplasma hyopneumoniae*

**Table S5.** continued

| Predictor variables                                             | Outcome variables   |                     |                          |                     |
|-----------------------------------------------------------------|---------------------|---------------------|--------------------------|---------------------|
|                                                                 | TI <sub>total</sub> | TI <sub>group</sub> | TI <sub>individual</sub> | TI <sub>ceflq</sub> |
| <i>Pluck lesions at slaughter and disease status</i>            |                     |                     |                          |                     |
| Pleurisy (%)                                                    | 0.05                | 0.035               | 0.959                    | 0.392               |
| Moderate to severe pleurisy (%)                                 | 0.049               | 0.033               | 0.983                    | 0.352               |
| Cranial pleurisy (%)                                            | 0.045               | 0.032               | 0.895                    | 0.366               |
| Pneumonia (%)                                                   | 0.562               | 0.707               | 0.382                    | 0.031               |
| Scars (%)                                                       | 0.098               | 0.091               | 0.879                    | 0.51                |
| Lung abscesses (%)                                              | 0.029               | 0.02                | 0.322                    | 0.986               |
| Pericarditis (%)                                                | 0.005               | 0.003               | 0.928                    | 0.026               |
| Liver milk spots (%)                                            | 0.712               | 0.427               | 0.046                    | 0.383               |
| PRRSv status ( <i>ref = no</i> )                                | 0.869               | 0.911               | 0.968                    | 0.162               |
| Swine influenza virus (IAv) status ( <i>ref = no</i> )          | 0.286               | 0.335               | 0.75                     | 0.755               |
| Mhyo status ( <i>ref = no</i> )                                 | 0.957               | 0.994               | 0.159                    | 0.759               |
| <i>Vaccination and prophylactic antimicrobial use practices</i> |                     |                     |                          |                     |
| Piglet prophylaxis ( <i>ref = no</i> )                          | 0.134               | 0.17                | 0.246                    | 0.197               |
| Sow prophylaxis ( <i>ref = no</i> )                             | 0.613               | 0.969               | 0.002                    | 0.007               |
| IAv vaccination ( <i>ref = no</i> )                             | 0.009               | 0.009               | 0.237                    | 0.266               |
| PRRSv vaccination ( <i>ref = no</i> )                           | 0.352               | 0.405               | 0.838                    | 0.875               |
| Mhyo vaccination ( <i>ref = no</i> )                            | 0.118               | 0.189               | 0.963                    | 0.92                |

Legend: IAv - influenza A virus; PRRSv - porcine reproductive and respiratory syndrome virus; Mhyo - *Mycoplasma hyopneumoniae*
