# Supplementary material for: Risk Factors for Antimicrobial Use on Irish Pig Farms
Source: MDPI journal article supplement (doi:10.3390/ani11102828), 2021-09-28
Supplement: s1 [file s1]

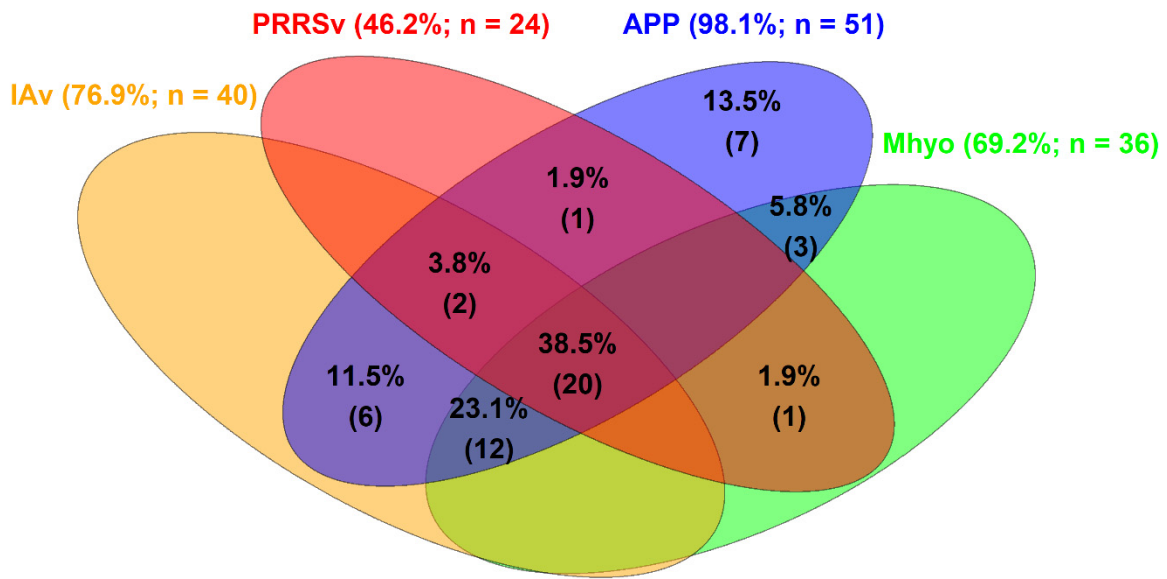

**Figure S1.** Venn diagram summarising co-infection with four respiratory pathogens on 52 Irish farrow-to-finish pig farms. Disease status for each farm was determined using serological testing.  
 Legend: IAv - influenza A virus, PRRSv - porcine respiratory and reproductive syndrome virus; APP - *Actinobacillus pleuropneumoniae*; Mhyo - *Mycoplasma hyopneumoniae*
